# Supplementary material for: Mpox stigma in the UK and implications for future outbreak control
Source: Research Square preprint supplement (doi:10.21203/rs.3.rs-5704043/v1), 2025-01-02
Supplement: Supplementary file 1 [file c1b84fe662a4816fa5319cb0.docx]

Supplementary Files:

**Appendix 1: Checklist for Reporting Of Survey Studies (CROSS)**

| **Section/topic** | **Item** | **Item description** | | **Reported on page #** | |
| --- | --- | --- | --- | --- | --- |
| **Title and abstract** | | | |  | |
| Title and abstract | 1a | State the word “survey” along with a commonly used term in title or abstract to introduce the study’s design. | | 2 | |
|  | | 1b | Provide an informative summary in the abstract, covering background, objectives, methods, findings/results, interpretation/discussion, and conclusions. | | 2-3 | |
| **Introduction** | | | |  | |
| Background | 2 | Provide a background about the rationale of study, what has been previously done, and why this survey is needed. | | 4-5 | |
| Purpose/aim | 3 | Identify specific purposes, aims, goals, or objectives of the study. | | 5 | |
| **Methods** | | | |  | |
| Study design | 4 | Specify the study design in the methods section with a commonly used term (e.g., cross-sectional or longitudinal). | | 5 | |
|  | 5a | Describe the questionnaire (e.g., number of sections, number of questions, number and names of instruments used). | | 8 | |
| Data collection methods | 5b | Describe all questionnaire instruments that were used in the survey to measure particular concepts. Report target population, reported validity and reliability information, scoring/classification procedure, and reference links (if any). | | N/A | |
| 5c | Provide information on pretesting of the questionnaire, if performed (in the article or in an online supplement). Report the method of pretesting, number of times questionnaire was pre-tested, number and demographics of participants used for pretesting, and the level of similarity of demographics between pre-testing participants and sample population. | | 7-8 | |
| 5d | Questionnaire if possible, should be fully provided (in the article, or as appendices or as an online supplement). | | A5 | |
| Sample characteristics | 6a | Describe the study population (i.e., background, locations, eligibility criteria for participant inclusion in survey, exclusion criteria). | | 6, 7 | |
| 6b | Describe the sampling techniques used (e.g., single stage or multistage sampling, simple random sampling, stratified sampling, cluster sampling, convenience sampling). Specify the locations of sample participants whenever clustered sampling was applied. | | 6 | |
| 6c | Provide information on sample size, along with details of sample size calculation. | | 6 | |
| 6d | Describe how representative the sample is of the study population (or target population if possible), particularly for population-based surveys. | | 6 | |
| Survey  administration | 7a | Provide information on modes of questionnaire administration, including the type and number of contacts, the location where the survey was conducted (e.g., outpatient room or by use of online tools, such as SurveyMonkey). | | 6 | |
| 7b | Provide information of survey’s time frame, such as periods of recruitment, exposure, and follow-up days. | | 6 | |
| 7c | Provide information on the entry process:  –>For non-web-based surveys, provide approaches to minimize human error in data entry.  –>For web-based surveys, provide approaches to prevent “multiple participation” of participants. | | 6, 8 | |
| Study preparation | 8 | Describe any preparation process before conducting the survey (e.g., interviewers’ training process, advertising the survey). | | 6 | |
| Ethical considerations | 9a | Provide information on ethical approval for the survey if obtained, including informed consent, institutional review board [IRB] approval, Helsinki declaration, and good clinical practice [GCP] declaration (as appropriate). | | 9 | |
| 9b | Provide information about survey anonymity and confidentiality and describe what mechanisms were used to protect unauthorized access. | | 9 | |
| Statistical  analysis | 10a | Describe statistical methods and analytical approach. Report the statistical software that was used for data analysis. | | 10 | |
| 10b | Report any modification of variables used in the analysis, along with reference (if available). | | N/A | |
| 10c | Report details about how missing data was handled. Include rate of missing items, missing data mechanism (i.e., missing completely at random [MCAR], missing at random [MAR] or missing not at random [MNAR]) and methods used to deal with missing data (e.g., multiple imputation). | | 10 | |
| 10d | State how non-response error was addressed. | | 28 | |
| 10e | For longitudinal surveys, state how loss to follow-up was addressed. | | N/A | |
| 10f | Indicate whether any methods such as weighting of items or propensity scores have been used to adjust for non-representativeness of the sample. | | N/A | |
|  | | 10g | Describe any sensitivity analysis conducted. | | N/A | |
| **Results** | | | |  | |
| Respondent characteristics | 11a | Report numbers of individuals at each stage of the study. Consider using a flow diagram, if possible. | | 11 | |
| 11b | Provide reasons for non-participation at each stage, if possible. | | 11 | |
| 11c | Report response rate, present the definition of response rate or the formula used to calculate response rate. | | 11 | |
| 11d | Provide information to define how unique visitors are determined. Report number of unique visitors along with relevant proportions (e.g., view proportion, participation proportion, completion proportion). | | N/A | |
| Descriptive  results | 12 | Provide characteristics of study participants, as well as information on potential confounders and assessed outcomes. | | 11, 12 | |
| Main findings | 13a | Give unadjusted estimates and, if applicable, confounder-adjusted estimates along with 95% confidence intervals and p-values. | | N/A | |
| 13b | For multivariable analysis, provide information on the model building process, model fit statistics, and model assumptions (as appropriate). | | N/A | |
|  | | 13c | Provide details about any sensitivity analysis performed. If there are considerable amount of missing data, report sensitivity analyses comparing the results of complete cases with that of the imputed dataset (if possible). | | N/A | |
| **Discussion** | | | |  | |
| Limitations | 14 | Discuss the limitations of the study, considering sources of potential biases and imprecisions, such as non-representativeness of sample, study design, important uncontrolled confounders. | | 27, 28 | |
| Interpretations | 15 | Give a cautious overall interpretation of results, based on potential biases and imprecisions and suggest areas for future research. | | 23-29 | |
| Generalizability | 16 | Discuss the external validity of the results. | | 23-29 | |
| **Other sections** | | | |  | |
| Role of funding source | 17 | State whether any funding organization has had any roles in the survey’s design, implementation, and analysis. | | 30 | |
| Conflict of interest | 18 | Declare any potential conflict of interest. | | 30 | |
| Acknowledgements | 19 | Provide names of organizations/persons that are acknowledged along with their contribution to the research. | | 31 | |

**Appendix 2: Expert iterative feedback process**

**Round 1**

Experts sent initial survey with questions adapted from literature and stakeholder interviews.

Experts asked to rate:

- - Clarity (C) of each question: scale of 1-4 (if <3, asked for suggested rephrasing)
  - Relevance (R) of each question: 1-4 (if <3, asked for reason)
  - Comprehensiveness: 1-4 (if <4, asked about missing components)

Also asked for feedback on:

- - Instructions and response options
  - Modular structure
  - Length of survey
- Calculate question and survey relevance CVI & adjust with modified Kappa
- Calculate survey comprehensiveness CVI
- If any <80% identify cause of concern from open text feedback

**Round 3**

Experts sent final form survey for content validation after translation, community review (including clarity assessment by intended respondents), field-testing, and psychometric analysis

Experts asked to rate:

- - Relevance of each question/module: 1-4 (if <3, asked for reason)
  - Comprehensiveness: 1-4 (if <4, asked about missing components)
  - Also asked for feedback on Instructions, response options, face validity and comprehensiveness
- CVI calculated and questions revised as per Round 1 criteria
  - All questions scored >80% for clarity and relevance
  - 95% experts thought all components were assessed

**Round 2:**

Experts sent revised survey (with controlled feedback (e.g., 86% scored this item quite or highly relevant).

Experts asked to score questions and provide feedback as in Round 1.

- Content Validity Index (CVI) calculated for each question:
  - If >80% for clarity and <80% for relevance: question excluded (0/11 questions)
  - If >80% for relevance and <80% for clarity: major revisions and included in Round 2 (6/11 questions)
  - If >80% for both: included with minor revisions based on consistent feedback (5/11 questions)
  - If <80% for both: major revisions when possible, otherwise excluded (0/11 questions)
  - Additional suggested questions added (41% experts thought all components were assessed in initial survey)

CVI = Content validity index

**Appendix 3: Content validation expert characteristics**

| Expert characteristics | Number of experts | | |
| --- | --- | --- | --- |
| **Round 1 (N = 41)** | **Round 2 (N = 39)** | **Round 3 (N = 35)** |
| WHO region* | | | |
| African Region | 9 | 9 | 8 |
| Region of the Americas | 6 | 5 | 5 |
| Eastern Mediterranean Region | 2 | 2 | 2 |
| European Region | 10 | 9 | 6 |
| South-East Asia Region | 8 | 8 | 7 |
| Western Pacific Region | 6 | 6 | 6 |
| Outbreak response experience (disease$) | | | |
| Mpox and other orthopoxviruses | 12 | 10 | 8 |
| Viral haemorrhagic fevers (e.g., Ebola, Marburg, Rift valley Fever) | 40 | 38 | 33 |
| COVID-19 | 12 | 11 | 11 |
| Other novel coronaviruses (SARS, MERS) | 5 | 5 | 5 |
| Nipah virus and other henipaviruses | 4 | 4 | 4 |
| Zika virus | 5 | 5 | 5 |
| Influenzae (all strains) | 6 | 6 | 6 |
| Cholera | 5 | 5 | 5 |
| Dengue | 7 | 7 | 7 |
| Plague | 1 | 1 | 1 |
| Hepatitis (A or E) | 2 | 2 | 2 |
| Chikungunya | 1 | 1 | 0 |
| Outbreak response experience (location) | | | |
| Local (in-country) | 35 | 34 | 30 |
| Regional/Global | 10 | 9 | 6 |
| Role in outbreak | | | |
| Psychosocial response team | 11 | 11 | 10 |
| Clinical response team | 12 | 11 | 10 |
| Social science research | 25 | 25 | 21 |
| Clinical research | 11 | 10 | 8 |
| Risk communication and community engagement | 20 | 18 | 16 |
| Patient advocacy | 6 | 5 | 4 |
| National Policy (e.g. Ministry of health) | 9 | 9 | 8 |
| International Policy and Advocacy (e.g., World Health Organization) | 8 | 8 | 6 |

**coded by nationality, 10 experts from each region invited to provide feedback, $original list based on WHO R&D blueprint with option to specify 'other', experts could select more than one option for all categories*

**Appendix 4: Final content validity scores**

| Module Number | Module content | Expert relevance CVI score | Interpretation |
| --- | --- | --- | --- |
| 1 | Care-seeking and stigma | 1.00 | Excellent |
| 2 | Beliefs and feelings | 1.00 | Excellent |
| 3 | Anticipated social stigma | 1.00 | Excellent |
| 4 | Anticipated structural stigma | 1.00 | Excellent |
| 5 | Personal experiences of stigma | 1.00 | Excellent |
| 6 | Concerns about sharing diagnosis and social acceptance | 0.97 | Excellent |
| 7 | Stigma by association | 1.00 | Excellent |
| 8 | Stigma reduction | 0.97 | Excellent |
| 9 | Stigma narratives | 0.97 | Excellent |

CVI = content validity index; interpretation: >0.8 considered adequate; >0.9 considered excellent

**Overall average survey-content validity index** (s-CVI): 0.97

**Overall survey comprehensiveness score:** 1.00

**Appendix 5:** Stigma-SCANR (UK mpox specific version)

Branching logic indicated by symbols (e.g., *,# )

Thank you for your interest in this survey on **mpox** **stigma**. This survey is run by researchers from the University of Oxford.

Mpox stigma happens when people look down on someone or treat them unkindly because they associate them with mpox (previously known as monkeypox).

**Some important details before you begin:**

1. We would like people to answer this survey if they are 18 years or older and have heard about mpox. **You don't need to have had personal experience of mpox** to take part in the survey.
2. It is voluntary to do the survey.
3. It usually takes about **15 minutes** to complete.
4. Your responses will be kept anonymous. We will not ask for your name or contact details. Your IP address will not be stored.
5. You can come back to the same survey as many times as you need before submitting.
6. Although it will not immediately benefit you, taking part in the survey will help us to reduce stigma and assist people who feel stigmatised in the future.
7. There is a risk that some of the questions remind you of difficult personal experiences. If this is the case for you, you can take a break or stop the survey. You can access resources for psychological or social support [here](https://isaric.org/research/monkeypox-response/stigma-mpox/).
8. Submitting the survey will be taken as permission to store and use your anonymous responses for research. This research will be published in an open-access journal and form part of a PhD.
9. Please only take the survey once.
10. This research has received ethics clearance from the University of Oxford Medical Sciences Division ethics committee (reference number: R87722/RE001).

If you have any questions or concerns about this survey please speak to Amy Paterson (**amy.paterson@ndm.ox.ac.uk**) or Piero Olliaro (**piero.olliaro@ndm.ox.ac.uk**). We will acknowledge your question or concern within 10 working days. You can also contact the Chair of the Research Ethics Committee at [ethics@medsci.ox.ac.uk](mailto:ethics@medsci.ox.ac.uk)

**Are you happy to proceed? Yes/No**

**Background details**

- Age: __ years
- Residential region: Midlands, England/Northern Ireland/North of England/Scotland/South of England/Wales/I do not live in the UK [end survey]
- Nature of residence: Urban (city/large town)/Rural (small town/village)
- Sex assigned at birth: Male/Female/Other/Prefer not to say
- Gender identity: woman/man/non-binary/other: please specify/prefer not to say
- Sexual orientation: straight/gay/lesbian/bisexual/asexual/other: please specify/prefer not to say
- Have you received an mpox vaccine? Yes/No/Unsure/Prefer not to say
- Are you a healthcare worker? Yes*/No#
- #Have you done work related to an infectious disease outbreak? Yes*/No
- *Have you been involved in responding to the mpox outbreak? Yes/No
- How would you rate your understanding of mpox?
- Never heard of it [end survey]
- Heard of it but don’t know many details
- Understand the basics (e.g., how it is passed on and typical symptoms)
- Know more than the basics
- Do you know of anyone close to you who has had mpox? Yes/No/Prefer not to say

**Module 1: Care-seeking and stigma**

1a. If willing to share, have you ever had mpox? Yes*/No§/Unsure§/Prefer not to say

1b. §Have you ever had symptoms that you thought may be due to mpox? Yes#/No/Prefer not to say

1c. *#Did you seek medical attention? Yes&/No/Prefer not to say

1d. &How long after you had the first symptom did you seek medical attention? XX days/No symptoms when tested/Prefer not to say

1e. In your opinion:

Which of the following are reasons someone with mpox symptoms may avoid seeking medical attention? (select all that apply)

- how their family members might respond
- how friends might respond
- how the public might respond
- how the government might respond
- concerns about losing accommodation
- concerns about losing work or education opportunities
- concerns about unkind treatment at the healthcare facility
- concerns about their name being linked to the disease
- concerns about feeling ashamed
- concerns that nothing can be done to help
- none of the above

1f. If you had symptoms of mpox today, would you choose to delay or avoid seeking medical attention for any of the above reasons? Yes/No/Unsure/Prefer not to say

**Module 2: Beliefs and feelings about people with mpox**

Note: For the purposes of this survey ‘your community’ means the people you regularly interact with.

**Imagine someone in your community has just been diagnosed with mpox and everyone knows.**

In your opinion:

2a. **How many people would believe that the person with mpox…**

|  | | None | A few | About half | Most | All |
| --- | --- | --- | --- | --- | --- | --- |
| 2a.1. | should be supported | o | o | o | o | o |
| 2a.2. | is to blame for getting mpox | o | o | o | o | o |
| 2a.3. | is immoral or sinful | o | o | o | o | o |
| 2a.4. | is dirty | o | o | o | o | o |
| 2a.5. | is cursed | o | o | o | o | o |
| 2a.6. | is dangerous | o | o | o | o | o |

**2b. How many people would feel…**

|  | | None | A few | About half | Most | All |
| --- | --- | --- | --- | --- | --- | --- |
| 2b.1. | Sympathy for the person with mpox | o | o | o | o | o |
| 2b.2. | Disapproving of the person (look down on them) | o | o | o | o | o |
| 2b.3. | Afraid of the person | o | o | o | o | o |
| 2b.4. | Disgusted by the person | o | o | o | o | o |
| 2b.5. | Angry with the person | o | o | o | o | o |

**Module 3: Anticipated social stigma**

In your opinion:

3a. How many of the following people might **negatively judge** a person because they have mpox?

|  | | None | A few | About half | Most | All |
| --- | --- | --- | --- | --- | --- | --- |
| 3a.1. | Casual/potential sexual partners | o | o | o | o | o |
| 3a.2. | Established partners/spouses | o | o | o | o | o |
| 3a.3. | The person’s family members | o | o | o | o | o |
| 3a.4. | The person’s friends | o | o | o | o | o |
| 3a.5. | The person’s co-workers/classmates | o | o | o | o | o |
| 3a.6. | General public | o | o | o | o | o |

3b. How many of the following people might **talk badly about** the person known to have mpox(including insulting language by message or social media)?

|  | | None | A few | About half | Most | All |
| --- | --- | --- | --- | --- | --- | --- |
| 3b.1. | Casual/potential sexual partners | o | o | o | o | o |
| 3b.2. | Established partners/spouses | o | o | o | o | o |
| 3b.3. | The person’s family members | o | o | o | o | o |
| 3b.4. | The person’s friends | o | o | o | o | o |
| 3b.5. | The person’s co-workers/classmates | o | o | o | o | o |
| 3b.6. | General public | o | o | o | o | o |
| 3b.7. | **Healthcare workers1** | o | o | o | o | o |
| 3b.8. | **Religious/community leaders** | o | o | o | o | o |
| 3b.9. | **Politicians** | o | o | o | o | o |
| 3b.10. | **The media/journalists** | o | o | o | o | o |

1including those working in clinics, GP practices, ambulances, hospitals, and treatment units

3c. How many of the following people might **physically harm or threaten to harm** the person with mpox or their property (including once recovered)?

|  | | None | A few | About half | Most | All |
| --- | --- | --- | --- | --- | --- | --- |
| 3c.1. | Casual/potential sexual partners | o | o | o | o | o |
| 3c.2. | Established partners/spouses | o | o | o | o | o |
| 3c.3. | The person’s family members | o | o | o | o | o |
| 3c.4. | The person’s friends | o | o | o | o | o |
| 3c.5. | The person’s co-workers/classmates | o | o | o | o | o |
| 3c.6. | General public | o | o | o | o | o |

**In your opinion:**

3d. How many of the following people might **avoid** a person known to have **recently recovered from mpox** (i.e., cannot pass the condition on)?

|  | | None | A few | About half | Most | All |
| --- | --- | --- | --- | --- | --- | --- |
| 3d.1. | Casual/potential sexual partners | o | o | o | o | o |
| 3d.2. | Established partners/spouses | o | o | o | o | o |
| 3d.3. | The person’s family members | o | o | o | o | o |
| 3d.4. | The person’s friends | o | o | o | o | o |
| 3d.5. | The person’s co-workers/classmates | o | o | o | o | o |
| 3d.6. | General public | o | o | o | o | o |

3e. How many people in the community might tell others about a person’s mpox diagnosis without their permission?

| None | A few | About half | Most | All |
| --- | --- | --- | --- | --- |

**3f. If people in your community heard that a hairdresser had recently recovered from mpox how many might still get their hair cut by them?**

| None | A few | About half | Most | All |
| --- | --- | --- | --- | --- |

**3g. When do you think the public opinion of someone who had mpox would return to the same as before?**

o Less than a week after recovery

o Weeks to months after recovery

o More than a year after recovery

o Never

**Module 4: Anticipated structural stigma**

1. How many of the following places/institutions might **disadvantage or exclude** people known to have **recently recovered from mpox**?

|  | | None | A few | About half | Most | All |
| --- | --- | --- | --- | --- | --- | --- |
| 4.1. | Government facilities | o | o | o | o | o |
| 4.2. | Workplaces | o | o | o | o | o |
| 4.3. | Schools or colleges | o | o | o | o | o |
| 4.4. | Healthcare facilities (e.g., clinics or hospitals) | o | o | o | o | o |
| 4.5. | Community gatherings/groups | o | o | o | o | o |
| 4.6. | Businesses (e.g., shops/bars/gyms) | o | o | o | o | o |
| 4.7. | Accommodation (e.g., landlords) | o | o | o | o | o |

**Module 5: Personal experiences of mpox stigma**

*[branching logic: only shown if yes to personal experience in demographics]*

You can choose ‘prefer not to say’ for any of these questions

5a. How many times have you experienced the following due to association with mpox?

|  | | Never | Only once* | A few (2-5) times* | Many (>5) times* | Prefer not to say* |
| --- | --- | --- | --- | --- | --- | --- |
| 5a.1. | Negative attitudes towards you | o | o | o | o | o |
| 5a.2. | Insulting or inappropriate language(directly towards you or used to describe you, including on social media) | o | o | o | o | o |
| 5a.3. | Physical harm or threats of harm(to you or your property) | o | o | o | o | o |
| 5a.4. | People avoiding you even when there is no risk of you giving them mpox | o | o | o | o | o |
| 5a.5. | Disadvantage or exclusion | o | o | o | o | o |

5b. *If you are willing to share, who acted in the above way(s) towards you? Select all that apply

Family member(s)/Friend(s)/Neighbour(s)/Co-worker(s)/Classmate(s)/Religious or community leader(s)/Politician(s)/General public/Other/Prefer not to say

5c. Select all that are true in your experience (at any point since diagnosis):

**Having mpox made me…**

- Feel ashamed
- Feel less confident
- Blame myself for getting mpox
- Avoid speaking to friends or family
- Avoid social gatherings even when recovered
- Want to talk to someone who had recovered from mpox
- Want to help others who may have mpox
- Willing to share my experience of mpox publicly
- Prefer not to say

5d. Was anyone close to you (e.g., partner, family) ever treated unkindly because of your mpox diagnosis? Yes/No/Unsure/Prefer not to say

5e. Have you ever felt stigmatised (looked down on or treated badly) because of a reason other than mpox in the past year? Yes/No/Prefer not to say

**Module 6: Concerns about sharing diagnosis and social acceptance**

[*branching logic: only shown if no personal history of mpox]****:***

6a. If you had mpox, do you think you would feel comfortable telling the following people about the diagnosis?

|  | | Yes | Probably | Unlikely | No |
| --- | --- | --- | --- | --- | --- |
| 6a.1. | a GP | o | o | o | o |
| 6a.2. | a recent sexual partner | o | o | o | o |
| 6a.3. | a close friend/family member | o | o | o | o |
| 6a.4. | your workplace/school/college | o | o | o | o |

6b. Please select all that apply below[[1]](#footnote-1):

I would be willing to accept someone who has recently recovered from mpox as…

- a new close friend
- my doctor
- a new neighbour on the same street
- a tourist in my country

**Module 7: Stigma by association**

7a. Do you think any of the following groups are treated negatively due to the mpox outbreak?

- People of certain sexual orientations (e.g., gay, lesbian, bisexual)
- People of certain gender identities (e.g., men, women, nonbinary) or trans people
- People with certain occupations (e.g., healthcare workers, sex workers)
- People from certain countries
- People of certain races or ethnicities
- People with less money than others in the community
- Other
- None of the above

Please briefly specify why you selected the options above: [open text]

*[Branching logic: Next questions only shown if yes to mpox responder question*]

7b. Did you ever feel negatively judged or treated unkindly due to your involvement in responding to the mpox outbreak? Yes/No/Prefer not to say

7c. Did the way you were treated during the mpox outbreak ever make you consider changing occupations? Yes/No/Prefer not to say

**Module 8: Stigma reduction**

1. In your opinion:

Which of the following would help reduce mpox stigma? (select all that apply)

- More public education about mpox
- More thoughtful public health messages
- A recovery certificate for those affected
- More psychological support
- More laws to stop discrimination
- Opportunities to hear the stories of people who have recovered from mpox
- Awareness campaigns about mpox stigma
- Other: please specify

**Module 9: Stigma narratives:**

9a. Are there any stories you have heard or seen shared about mpox or people with mpox that you think contribute to stigma? If so, please share them here: [open text]

9b. Are there any stories you would like people to share about mpox or people with mpox? If so, please share them here: [open text]

**Appendix 6: Additional qualitative quotes**

| Component of stigma | Additional qualitative quotes |
| --- | --- |
| Drivers | *“People often use any excuse to demonise minorities and I think mpox could be used as one of these excuses”* – Respondent 180, Northern Ireland  “*The testing criteria for mpox unfortunately exacerbates the stigma*” – Respondent 337, Wales  “*The media is doing a good job of stirring up fear*.” – Respondent 405, Midlands England |
| Manifestations | “*A friend of mine contracted mpox. After disclosing his diagnosis, he faced significant backlash and ostracism from his community and workplace*” – Respondent 58, Midlands England  “*I can imagine that minorities may be treated differently by a few people [due to mpox] but I don't believe this would be the norm*.” – Respondent 254, Scotland  *"There was a lot on social media about certain ethnicities having mpox and LGBT people. There were horrible things said."* – Respondent 54, South of England |
| Impact | *"Mpox has the potential to negatively affect and further isolate already marginalised groups of people."* – Respondent 2, South of England  *"I think groups that would already be vulnerable to harassment are treated worse if [there is] an outbreak."* – Respondent 158, Midlands, England  *“My friend had it and people knew and they kept on spreading [the news of his diagnosis] till everyone knew it.  It made him have low self esteem*” – Respondent 437, Northern Ireland |

1. Question adapted from Bogardus Social Distance Scale: Bogardus E. S. (1925. b). Social distance and its origins. Journal of Applied Sociology, 9, 216–226. <https://babel.hathitrust.org/cgi/pt?id=inu.30000104215342&view=1up&seq=226&q1=bogardus> [↑](#footnote-ref-1)
